# Supplementary material for: Thin Films of Chlorinated Vanadyl Phthalocyanines as Active Layers of Chemiresistive Sensors for the Detection of Ammonia
Source: MDPI journal article supplement (doi:10.3390/mi14091773), 2023-09-15
Supplement: s1 [file s1]

## Supporting Information

### Thin films of chlorinated vanadyl phthalocyanines as active layers of chemiresistive sensors for the detection of ammonia

Darya Klyamer<sup>1</sup>, Alexandr Sukhikh<sup>1</sup>, Dmitry Bonegardt<sup>1</sup>, Pavel Krasnov<sup>2</sup>, Pavel Popovetskiy<sup>1</sup>, Tamara Basova<sup>1\*</sup>

<sup>1</sup> Nikolaev Institute of Inorganic Chemistry SB RAS, 3 Lavrentiev Pr., 630090 Novosibirsk, Russia; niic@niic.nsc.ru

<sup>2</sup> International Research Center of Spectroscopy and Quantum Chemistry, Siberian Federal University, 26 Kirensky st., 660074 Krasnoyarsk, Russia

\* Correspondence: basova@niic.nsc.ru;

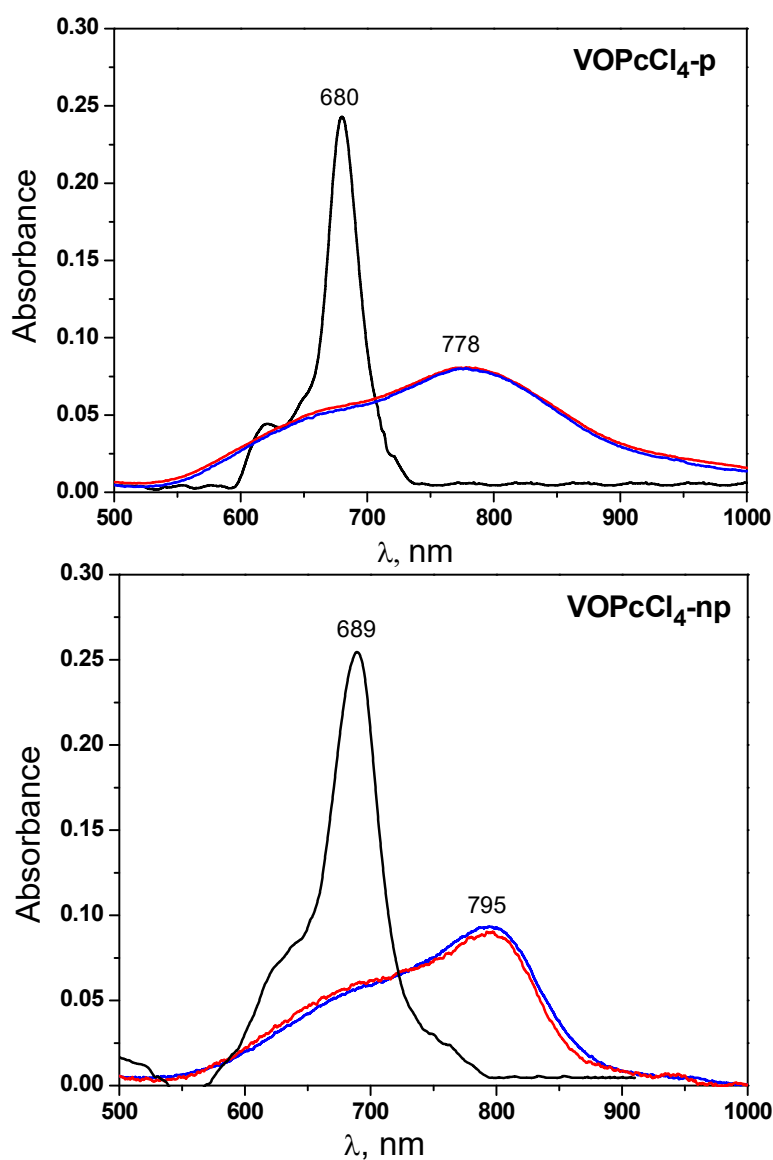

**Figure S1.** Optical absorption spectra of the solutions of VOPcCl<sub>4</sub>-p and VOPcCl<sub>4</sub>-np in dimethylformamide (black lines) and their films before (blue lines) and after (red lines) heat treatment.

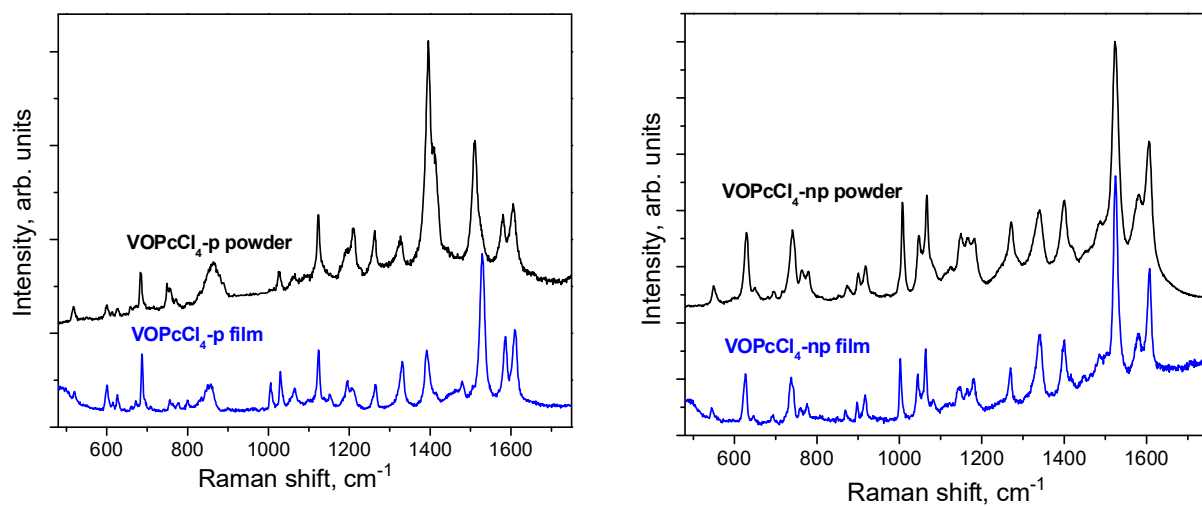

**Figure S2.** Raman spectra of VOPcCl<sub>4</sub>-p and VOPcCl<sub>4</sub>-np films (blue lines) and powders (black lines).

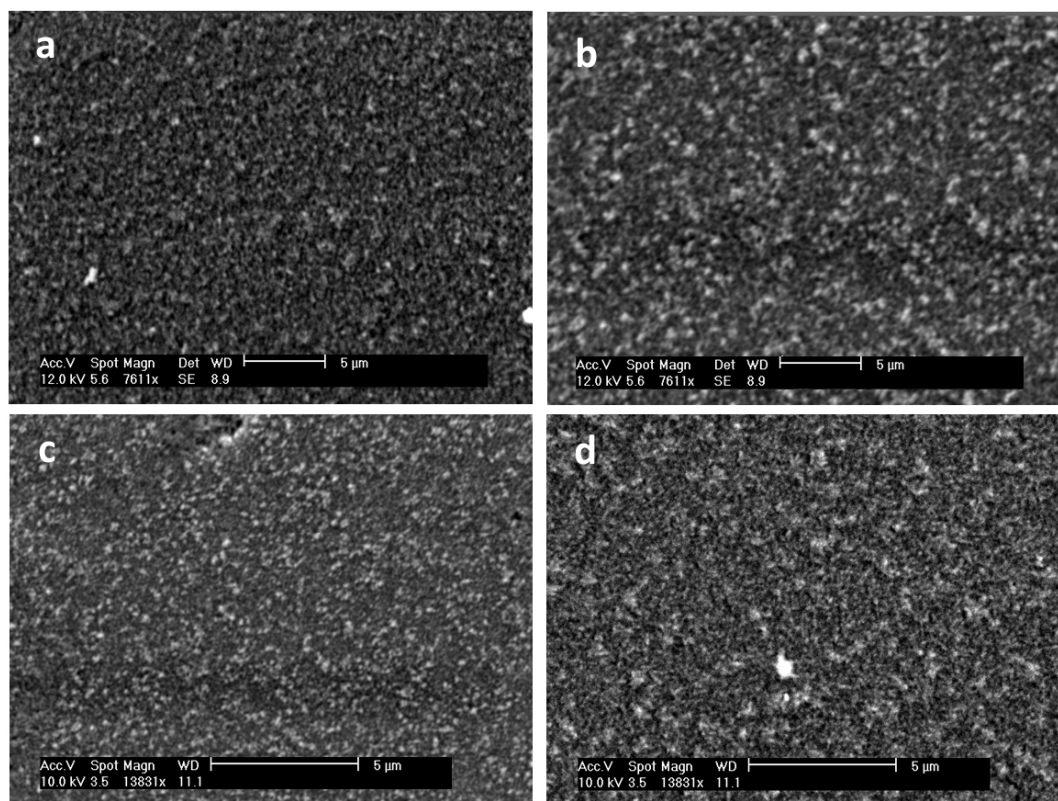

**Figure S3.** SEM images of VOPcCl<sub>4</sub>-p and VOPcCl<sub>4</sub>-np (black lines) and their films before (a, c) and after (b, d) heat treatment.

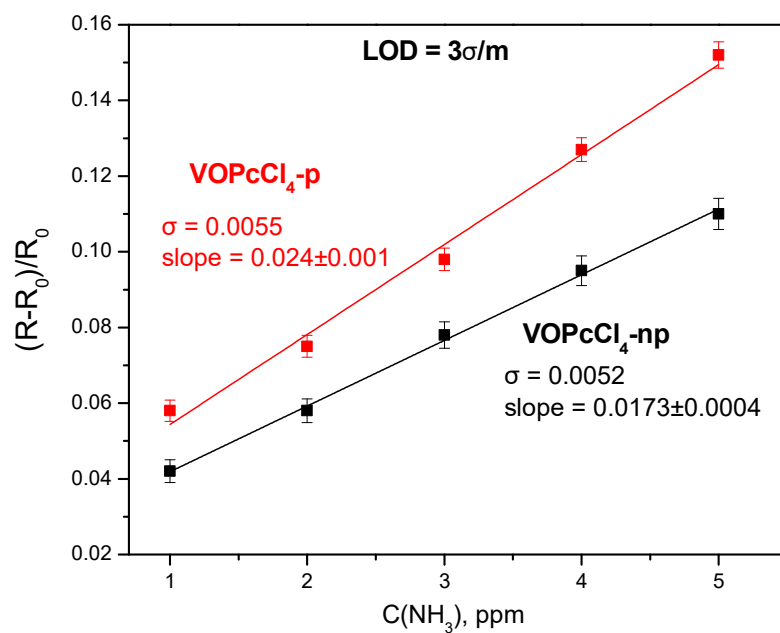

**Figure S4.** Dependencies of the sensor response and fitting parameters used for the calculation of LODs of  $\text{VOPcCl}_4\text{-p}$  and  $\text{VOPcCl}_4\text{-np}$  films.

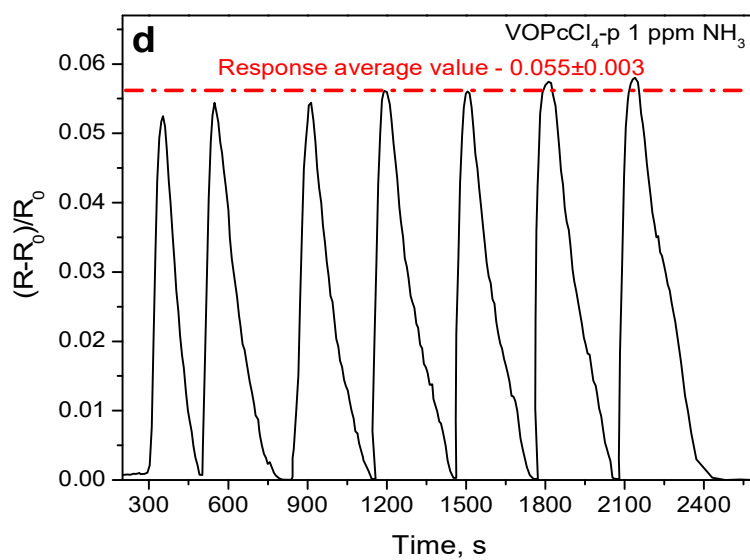

**Figure S5.** Repeatability of the sensor response of a  $\text{VOPcCl}_4\text{-p}$  film, measured at 1 ppm of  $\text{NH}_3$ .

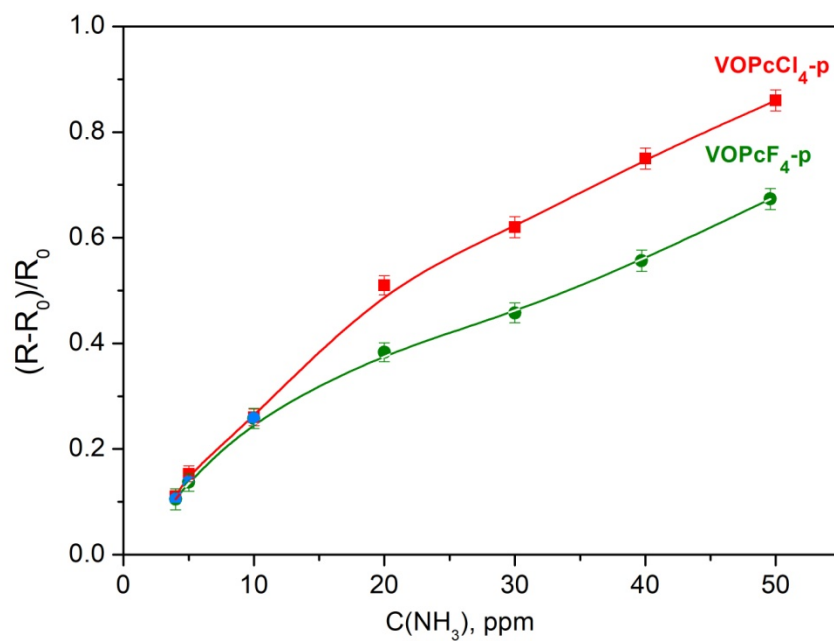

**Figure S6.** Comparison of the dependence of the sensor response on ammonia concentration for VOPcCl<sub>4</sub>-p and VOPcF<sub>4</sub>-p films.

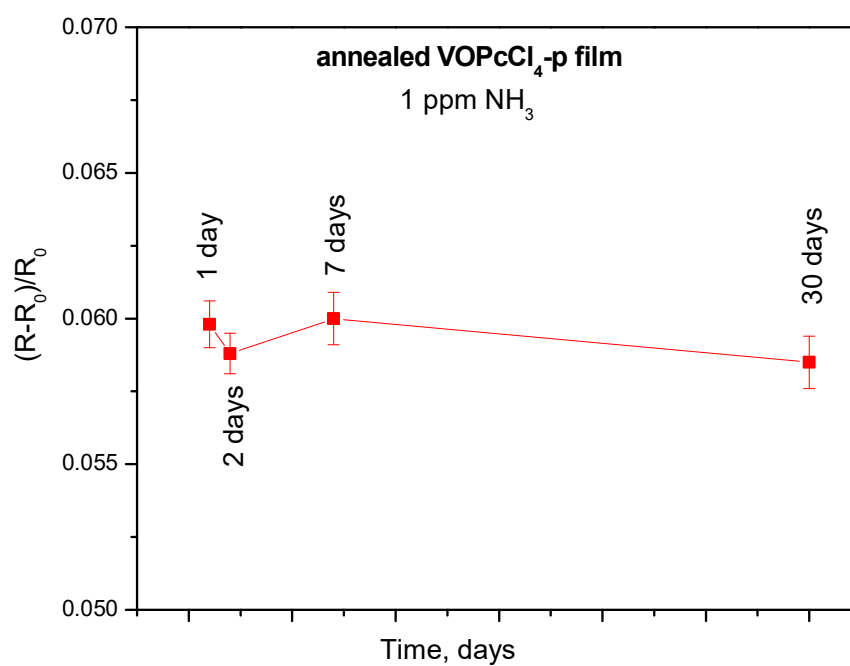

**Figure S7.** The sensor response of an annealed VOPcCl<sub>4</sub>-p film to 1 ppm of NH<sub>3</sub>, measured in 1, 2, 7 and 30 days.
